# Supplementary material for: From Bite to Byte: Dental Structures Resolved at a Single-Cell Resolution
Source: PubMed Central journal article supplement — J Dent Res. 2021 Mar 25;100(9):897–905. doi: 10.1177/00220345211001848 (PMC8293759; doi:10.1177/00220345211001848), 2021-03-25
Supplement: sj-pdf-1-jdr-10.1177_00220345211001848.pdf [file sj-pdf-1-jdr-10.1177_00220345211001848.pdf]

## **From bite to byte: Dental structures resolved at a single-cell resolution**

Roberta Fresia, Pauline Marangoni, Tal Burstyn-Cohen, and Amnon Sharir

### **Appendix: Mouse lines used for *in vivo* genetic lineage tracing to validate predictions of scRNA-seq findings.**

Bmi1CreER (*Bmi1tm1(cre/ESR1)Mrc*, Jax: 010531)

*FosCreERT2/R26ZsGreen1*

*Foxd1CreERT2/Ai9* mice

Gli1CreER (*Gli1tm3(cre/ERT2)Alj*, Jax: 007913)

Lrig1CreER (*Lrig1tm1.1(cre/ERT2)Rjc*, Jax: 018418)

Notch1CreER (*Notch1tm5(cre/ERT2)Rko*, Jax: 027235)

Sox2CreER (*Sox2tm1(cre/ERT2)Hoch*, Jax: 017593)

Tg(*KRT14-RFP*)#Efu (Krt14-RFP)
